# Supplementary material
Source: PubMed Central journal article supplement (PMC3025425)
Supplement: peds.2010-0497_1.pdf [file peds.2010-0497_1.pdf]

## Supplemental Information

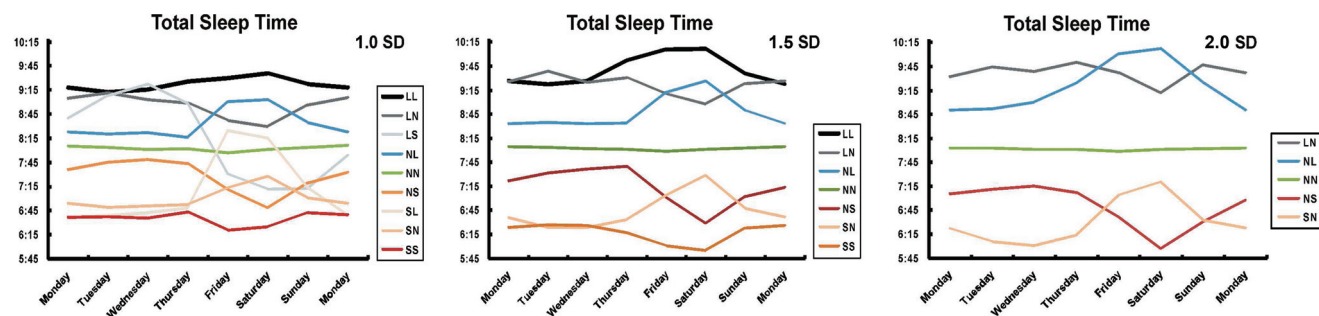

**SUPPLEMENTAL FIGURE 4**

One-week trends of sleep durations for the 9 sleep pattern subgroups determined with 1-SD, 1.5-SD, and 2-SD cutoff values.

**SUPPLEMENTAL TABLE 5** TST and SV Values for Normal-Weight, Overweight, and Obese Children

|                                     | Week               |                    |                    | School Days vs Weekend Days |          |
|-------------------------------------|--------------------|--------------------|--------------------|-----------------------------|----------|
|                                     | Week               | School Days        | Weekend Days       | <i>t</i>                    | <i>P</i> |
| Normal-weight ( <i>N</i> = 155)     |                    |                    |                    |                             |          |
| TST, min                            |                    |                    |                    |                             |          |
| Mean ± SD (95% CI)                  | 482 ± 43 (475–489) | 481 ± 46 (474–488) | 485 ± 53 (476–493) | −0.6                        | .53      |
| Median (range)                      | 482 (384–589)      | 484 (366–605)      | 487 (347–641)      |                             |          |
| SV, %                               | 10.11 ± 5.02       | 8.8 ± 5.4          | 9.9 ± 8.9          | −1.3                        | .20      |
| Overweight ( <i>N</i> = 53)         |                    |                    |                    |                             |          |
| TST, min                            |                    |                    |                    |                             |          |
| Mean ± SD (95% CI)                  | 491 ± 46 (478–504) | 490 ± 46 (477–503) | 495 ± 69 (476–514) | −0.4                        | .69      |
| Median (range)                      | 497 (368–591)      | 494 (370–588)      | 493 (354–656)      |                             |          |
| SV, %                               | 9.8 ± 4.5          | 8.6 ± 5.5          | 7.8 ± 6            | 0.7                         | .49      |
| Obese ( <i>N</i> = 100)             |                    |                    |                    |                             |          |
| TST, min                            |                    |                    |                    |                             |          |
| Mean ± SD (95% CI)                  | 473 ± 45 (464–482) | 477 ± 49 (467–487) | 465 ± 63 (453–478) | 1.5                         | .15      |
| Median (range)                      | 473 (349–591)      | 475 (310–614)      | 470 (264–603)      |                             |          |
| SV, %                               | 9.8 ± 4.5          | 9.2 ± 4.7          | 11.5 ± 8.3         | 2.4                         | .016     |
| Analysis of covariance <sup>a</sup> |                    |                    |                    |                             |          |
| <i>F</i> <sub>2,307</sub>           | 1.8                | 0.9                | 3.5                |                             |          |
| <i>P</i>                            | .17                | .40                | .03                |                             |          |

<sup>a</sup> The covariate was age.

**SUPPLEMENTAL TABLE 6** Partial Correlations Between BMI z Scores and Sleep Durations for Normal-Weight, Overweight, and Obese Children

|              | Correlation With BMI z Scores |                     |                 |
|--------------|-------------------------------|---------------------|-----------------|
|              | Normal-Weight (N = 155)       | Overweight (N = 53) | Obese (N = 100) |
| Mean TST     |                               |                     |                 |
| Week         | -0.10                         | 0.31 <sup>a</sup>   | -0.04           |
| School days  | -0.08                         | 0.24                | -0.06           |
| Weekend days | -0.11                         | 0.29 <sup>a</sup>   | 0.01            |
| SV           |                               |                     |                 |
| Week         | -0.09                         | 0.05                | -0.11           |
| School days  | -0.10                         | -0.14               | -0.15           |
| Weekend days | -0.06                         | 0.16                | -0.0001         |

Correlations were controlled for age.

<sup>a</sup> Significant at  $P < .05$ .

**SUPPLEMENTAL TABLE 7** Partial Correlations Between Metabolic Marker Levels and Sleep Durations for Normal-Weight, Overweight, and Obese Children

|                        | Correlation   |               |                    |                   |           |           |           |
|------------------------|---------------|---------------|--------------------|-------------------|-----------|-----------|-----------|
|                        | Glucose Level | Insulin Level | Triglyceride Level | Cholesterol Level | HDL Level | LDL Level | CRP Level |
| Mean TST               |               |               |                    |                   |           |           |           |
| Week                   |               |               |                    |                   |           |           |           |
| Normal-weight (n = 44) | 0.11          | -0.02         | 0.004              | -0.003            | 0.06      | -0.03     | 0.09      |
| Overweight (n = 16)    | 0.03          | 0.09          | 0.04               | 0.21              | 0.13      | 0.21      | -0.12     |
| Obese (n = 47)         | -0.04         | -0.22         | -0.15              | -0.004            | 0.017     | -0.03     | -0.07     |
| School days            |               |               |                    |                   |           |           |           |
| Normal-weight (n = 44) | 0.09          | 0.01          | 0.01               | 0.01              | 0.06      | -0.03     | 0.02      |
| Overweight (n = 16)    | 0.02          | 0.18          | 0.02               | 0.18              | 0.11      | 0.19      | 0.04      |
| Obese (n = 47)         | -0.05         | -0.17         | -0.11              | -0.05             | 0.1       | -0.07     | -0.18     |
| Weekend days           |               |               |                    |                   |           |           |           |
| Normal-weight (n = 44) | 0.09          | -0.09         | -0.08              | -0.09             | 0.002     | -0.09     | 0.24      |
| Overweight (n = 16)    | 0.02          | -0.08         | 0.02               | 0.18              | 0.11      | 0.2       | -0.3      |
| Obese (n = 47)         | -0.03         | -0.21         | -0.19              | 0.07              | 0.2       | 0.07      | 0.14      |
| SV                     |               |               |                    |                   |           |           |           |
| Week                   |               |               |                    |                   |           |           |           |
| Normal-weight (n = 44) | -0.03         | 0.1           | -0.07              | -0.08             | -0.08     | -0.04     | -0.13     |
| Overweight (n = 16)    | -0.24         | -0.03         | -0.19              | 0.14              | 0.12      | 0.19      | 0.07      |
| Obese (n = 47)         | -0.13         | 0.09          | 0.10               | 0.19              | 0.22      | 0.09      | -0.24     |
| School days            |               |               |                    |                   |           |           |           |
| Normal-weight (n = 44) | 0.02          | 0.16          | -0.03              | -0.07             | -0.06     | -0.04     | -0.13     |
| Overweight (n = 16)    | -0.33         | 0.07          | 0.003              | 0.32              | 0.2       | 0.33      | -0.01     |
| Obese (n = 47)         | -0.14         | 0.07          | 0.31 <sup>a</sup>  | 0.22              | 0.19      | 0.08      | -0.18     |
| Weekend days           |               |               |                    |                   |           |           |           |
| Normal-weight (n = 35) | -0.11         | -0.07         | -0.07              | -0.2              | -0.13     | -0.16     | -0.33     |
| Overweight (n = 16)    | 0.42          | -0.01         | -0.39              | -0.23             | -0.07     | -0.17     | 0.18      |
| Obese (n = 45)         | -0.05         | -0.05         | -0.26              | -0.05             | 0.28      | -0.1      | 0.05      |

Correlations were controlled for age.

<sup>a</sup> Significant at  $P < .05$ .

**SUPPLEMENTAL TABLE 8** Demographic Features, BMI z Scores, and RDI Values for 9 Sleep Pattern Subgroups, With 1-SD, 1.5-SD, and 2-SD Cutoff Values

| Subgroup                   | n   | Age,<br>Mean $\pm$ SD, y | Female,<br>% | Race/Ethnicity, %     |       |       | BMI z Score,<br>Mean $\pm$ SD | RDI, Mean $\pm$ SD |
|----------------------------|-----|--------------------------|--------------|-----------------------|-------|-------|-------------------------------|--------------------|
|                            |     |                          |              | Non-Hispanic<br>White | Black | Other |                               |                    |
| <b>1 SD<sup>a</sup></b>    |     |                          |              |                       |       |       |                               |                    |
| SS                         | 16  | 7.4 $\pm$ 1.6            | 1.6          | 2.6                   | 2.3   | 0.3   | 1.2 $\pm$ 1.3                 | 2.9 $\pm$ 4.6      |
| SN                         | 27  | 7.4 $\pm$ 1.3            | 6.2          | 5.6                   | 2.0   | 1.3   | 1.1 $\pm$ 1.1                 | 1.2 $\pm$ 1.3      |
| SL                         | 3   | 6.8 $\pm$ 0.5            | 0.3          | 0.7                   | 0.0   | 0.3   | 0.3 $\pm$ 1.3                 | 1.1 $\pm$ 0.6      |
| NS                         | 25  | 8.0 $\pm$ 1.3            | 3.9          | 5.2                   | 1.0   | 2.0   | 1.3 $\pm$ 1.0                 | 2.7 $\pm$ 6.5      |
| NN                         | 163 | 7.0 $\pm$ 1.3            | 25.8         | 39.2                  | 10.5  | 3.6   | 1.1 $\pm$ 1.1                 | 1.3 $\pm$ 2.6      |
| NL                         | 29  | 7.3 $\pm$ 1.2            | 6.2          | 6.5                   | 1.6   | 1.3   | 0.8 $\pm$ 1.1                 | 1.3 $\pm$ 1.6      |
| LS                         | 2   | 6.8 $\pm$ 0.6            | 0.3          | 0.0                   | 0.7   | 0.0   | 2.1 $\pm$ 0.5                 | 0.7 $\pm$ 0.1      |
| LN                         | 23  | 6.8 $\pm$ 1.3            | 3.9          | 6.9                   | 0.3   | 0.3   | 0.9 $\pm$ 1.2                 | 1.5 $\pm$ 2.1      |
| LL                         | 18  | 6.9 $\pm$ 1.1            | 2.6          | 4.9                   | 0.7   | 0.3   | 1.0 $\pm$ 1.2                 | 0.7 $\pm$ 0.6      |
| <b>1.5 SDs<sup>b</sup></b> |     |                          |              |                       |       |       |                               |                    |
| SS                         | 7   | 7.1 $\pm$ 1.1            | 1            | 1                     | 1.3   | 0     | 1.9 $\pm$ 1.1                 | 4.6 $\pm$ 6.5      |
| SN                         | 15  | 7.5 $\pm$ 1.2            | 2.6          | 3.3                   | 1.3   | 0.3   | 0.7 $\pm$ 1.3                 | 1.3 $\pm$ 1.2      |
| NS                         | 13  | 8.4 $\pm$ 1.5            | 2.3          | 2                     | 1     | 1.3   | 1.6 $\pm$ 0.9                 | 4 $\pm$ 8.5        |
| NN                         | 241 | 7.1 $\pm$ 1.3            | 39.5         | 58.5                  | 13.1  | 7.2   | 1.0 $\pm$ 1.1                 | 1.2 $\pm$ 2.3      |
| NL                         | 13  | 7.7 $\pm$ 1.5            | 2            | 2.3                   | 1.3   | 0.7   | 1.1 $\pm$ 1.0                 | 0.9 $\pm$ 0.6      |
| LN                         | 11  | 6.7 $\pm$ 1.8            | 2.3          | 3.3                   | 0.3   | 0     | 1.2 $\pm$ 1.3                 | 1.3 $\pm$ 2.7      |
| LL                         | 6   | 7.4 $\pm$ 0.8            | 1.3          | 1.3                   | 0.7   | 0     | 1.2 $\pm$ 1.4                 | 0.9 $\pm$ 0.7      |
| <b>2 SDs<sup>c</sup></b>   |     |                          |              |                       |       |       |                               |                    |
| SN                         | 7   | 7.7 $\pm$ 1.4            | 0.7          | 1.3                   | 0.7   | 0.3   | 0.9 $\pm$ 1.3                 | 0.9 $\pm$ 0.6      |
| NS                         | 8   | 8.2 $\pm$ 1.5            | 1            | 1.3                   | 1.0   | 0.3   | 2.2 $\pm$ 0.8                 | 5.3 $\pm$ 6.1      |
| NN                         | 278 | 7.1 $\pm$ 1.3            | 46.4         | 65                    | 17.0  | 8.8   | 1.0 $\pm$ 1.1                 | 1.35 $\pm$ 2.9     |
| NL                         | 5   | 7.6 $\pm$ 1.2            | 1            | 1.3                   | 0.3   | 0     | 1.1 $\pm$ 1.1                 | 0.8 $\pm$ 0.8      |
| LN                         | 6   | 6.8 $\pm$ 0.6            | 1.6          | 2.0                   | 0     | 0     | 1.2 $\pm$ 1.0                 | 1.9 $\pm$ 3.5      |

<sup>a</sup> Age:  $F_{8,297} = 2.1$ ;  $P = .04$  for NS group versus NN group and NS group versus LN group; BMI z score:  $F_{8,297} = 0.8$ ;  $P = .59$ ; gender:  $\chi^2_8 = 10.2$ ;  $P = .25$ ; race/ethnicity: too few cells with sufficient numbers of subjects; when other race was excluded, a tendency existed for more black children in the SS and LS groups, in comparison with non-Hispanic white children; RDI:  $F_{8,236} = 1.1$ ;  $P = .39$ .

<sup>b</sup> Age:  $F_{6,299} = 2.9$ ;  $P = .01$  for NS group versus NN group and NS group versus LN group; BMI z score:  $F_{6,299} = 1.5$ ;  $P = .19$ ; gender:  $\chi^2_6 = 1.7$ ;  $P = .92$ ; race/ethnicity:  $\chi^2_6 = 10.9$ ;  $P = .09$  when only black and non-Hispanic white children were compared; RDI:  $F_{6,238} = 2.9$ ;  $P = .01$ ; in posthoc tests, no differences were found.

<sup>c</sup> Age:  $F_{6,299} = 1.3$ ;  $P = .26$ ; BMI z score:  $F_{6,299} = 1.7$ ;  $P = .12$ ; gender:  $\chi^2_6 = 6.7$ ;  $P = .35$ ; race/ethnicity:  $\chi^2_6 = 4.7$ ;  $P = .6$  when black and non-Hispanic white children were compared; RDI:  $F_{6,238} = 2.1$ ;  $P = .06$ .

**SUPPLEMENTAL TABLE 9** TST and SV Values for 9 Sleep Pattern Subgroups, With 1-SD, 1.5-SD, and 2-SD Cutoff Values

|                 | TST, Mean ± SD, min |             |              | SV, Mean ± SD, % |             |              |
|-----------------|---------------------|-------------|--------------|------------------|-------------|--------------|
|                 | Week                | School Days | Weekend Days | Week             | School Days | Weekend Days |
| <b>1 SD</b>     |                     |             |              |                  |             |              |
| SS              | 396 ± 21            | 405 ± 19    | 373 ± 39     | 12.7 ± 4.9       | 10.9 ± 5.5  | 12.6 ± 11    |
| SN              | 421 ± 19            | 406 ± 27    | 460 ± 21     | 11.8 ± 4.5       | 9.1 ± 5.0   | 11.5 ± 7.8   |
| SL              | 431 ± 26            | 391 ± 28    | 558 ± 09     | 20.4 ± 5.1       | 9.0 ± 4.7   | 16.4 ± 3.8   |
| NS              | 446 ± 20            | 469 ± 24    | 387 ± 27     | 13.8 ± 4.7       | 9.6 ± 4.9   | 15.2 ± 10.3  |
| NN <sup>a</sup> | 483 ± 22            | 484 ± 26    | 479 ± 32     | 9.3 ± 4.6        | 8.6 ± 5.2   | 9.3 ± 7.9    |
| NL              | 514 ± 18            | 493 ± 21    | 568 ± 21     | 11.5 ± 3.3       | 8.2 ± 4.1   | 10.7 ± 7.9   |
| LS              | 493 ± 17            | 549 ± 00    | 388 ± 13     | 19.5 ± 1.6       | 9.9 ± 2.9   | 9.1 ± 2.3    |
| LN              | 535 ± 20            | 550 ± 21    | 499 ± 26     | 11.7 ± 4.9       | 10.7 ± 7.4  | 9.0 ± 8.3    |
| LL              | 564 ± 19            | 558 ± 20    | 578 ± 31     | 7.7 ± 3.9        | 7.9 ± 4.6   | 6.0 ± 6.2    |
| <b>1.5 SDs</b>  |                     |             |              |                  |             |              |
| SS              | 377 ± 15            | 391 ± 12    | 344 ± 40     | 13.5 ± 4.8       | 11.3 ± 6.3  | 11.0 ± 7.1   |
| SN              | 405 ± 19            | 382 ± 23    | 471 ± 45     | 16.7 ± 4.7       | 12.3 ± 4.6  | 14.8 ± 11.0  |
| NS              | 433 ± 26            | 463 ± 37    | 361 ± 20     | 15.7 ± 4.3       | 10.5 ± 4.7  | 11.8 ± 10.0  |
| NN <sup>a</sup> | 482 ± 30            | 483 ± 34    | 480 ± 43     | 9.8 ± 4.6        | 8.7 ± 5.3   | 10.0 ± 8.2   |
| NL              | 529 ± 20            | 505 ± 27    | 588 ± 16     | 11.6 ± 3.8       | 7.6 ± 2.8   | 11.4 ± 8.5   |
| LN              | 562 ± 19            | 576 ± 20    | 527 ± 25     | 8.9 ± 4.1        | 8.1 ± 5.0   | 6.6 ± 6.0    |
| LL              | 583 ± 04            | 569 ± 09    | 614 ± 27     | 8.0 ± 5.3        | 8.6 ± 6.4   | 2.9 ± 2.8    |
| <b>2 SDs</b>    |                     |             |              |                  |             |              |
| SN              | 390 ± 23            | 362 ± 23    | 471 ± 70     | 18.0 ± 6.1       | 13.2 ± 3.1  | 9.0 ± 5.8    |
| NS              | 405 ± 37            | 434 ± 39    | 331 ± 29     | 17.0 ± 2.7       | 10.0 ± 5.4  | 16.5 ± 9.6   |
| NN <sup>a</sup> | 482 ± 36            | 482 ± 39    | 481 ± 51     | 10.2 ± 4.7       | 8.8 ± 5.3   | 10.2 ± 8.4   |
| NL              | 565 ± 26            | 539 ± 32    | 627 ± 23     | 11.8 ± 4.3       | 10.4 ± 6.4  | 4.2 ± 3.1    |
| LN              | 579 ± 14            | 592 ± 14    | 543 ± 33     | 8.2 ± 3.4        | 7.6 ± 3.2   | 5.4 ± 3.5    |

TST values were controlled for age.

<sup>a</sup> Mean of sample.
